# Supplementary material for: Long Noncoding RNA FENDRR Inhibits Lung Fibroblast Proliferation via a Reduction of β-Catenin
Source: MDPI journal article supplement (doi:10.3390/ijms22168536), 2021-08-09
Supplement: s1 [file s1]

## Supplementary Methods

### *RNA sequencing and data analysis*

RNA sequencing was performed on the lung tissues collected on day 21 from *FENDRR* adenovirus- and/or asbestos-treated mice. RNAs were equally pooled (500 ng per animal) from each treatment group for each sex: VC-TiO<sub>2</sub> (male 7, female 8), *FENDRR*-TiO<sub>2</sub> (male 6, female 6), VC-Crocidolite (male 8, female 9) and *FENDRR*-Crocidolite (male 8, female 7). Therefore, 8 groups in total were generated for RNA sequencing. RNA quantitation and quality including RNA degradation, contamination, and integrity were assessed by using Nanodrop, Agilent Bioanalyzer 2100 and agarose gel electrophoresis. High-quality RNAs were used to prepare the sequencing library with the Illumina mRNA library preparation kit. In brief, mRNA was enriched using oligo(dT) beads. mRNA was fragmented. The first-strand cDNA was synthesized by using the mRNA template and random hexamers primer, followed by the second-strand cDNA synthesis using a second-strand synthesis buffer (Illumina), dNTPs, RNase H, and DNA polymerase I. A was added to 3' end of the double-stranded cDNAs and then sequencing adaptor was ligated. Finally, the double-stranded cDNA library was subjected to size selection and PCR enrichment. The quality control of library was performed by the following three steps: (1) determining the library concentration preliminarily by Qubit 2.0, (2) assessing the insert size using Agilent 2100, and (3) quantifying the library effective concentration precisely via Q-PCR. The qualified libraries were sequenced using an Illumina sequencer. Each sample was sequenced to generate a minimum of 20 million reads. The sequenced reads were filtered by removing the reads containing (1) adapters, (2) more than 10% of the bases that can not be determined or (3) more than 50% of the bases that are low quality (Qscore ≤ 5) base.

The clean paired-end reads were directionally mapped to the mouse genome (GRCm38.p6) by TopHat2 with the following parameters: Num-threads were set to 24, GTF-formatted file containing mRNA gene annotation was supplied, transcriptome-index was set to transcriptome data/known, the coverage-based search for junctions was disabled, splice-mismatches was set to 1, and min-anchor-length was set to 7.

Cufflink and CuffDiff analysis for mixed genders (4 treatment groups) were run to identify the differentially expressed genes in these samples with the following parameters: Num-threads was set to 12, GTF-formatted file containing mRNA gene annotation was supplied, and a false discovery rate (FDR) value was 0.05. Genes with a fold change of ≥ 2 and FDR of < 0.05 were considered to be differentially expressed. The function annotation was performed by using STRING analysis (<https://string-db.org/>). The RNA sequencing datasets have been submitted to GEO (access number, GSE175496).

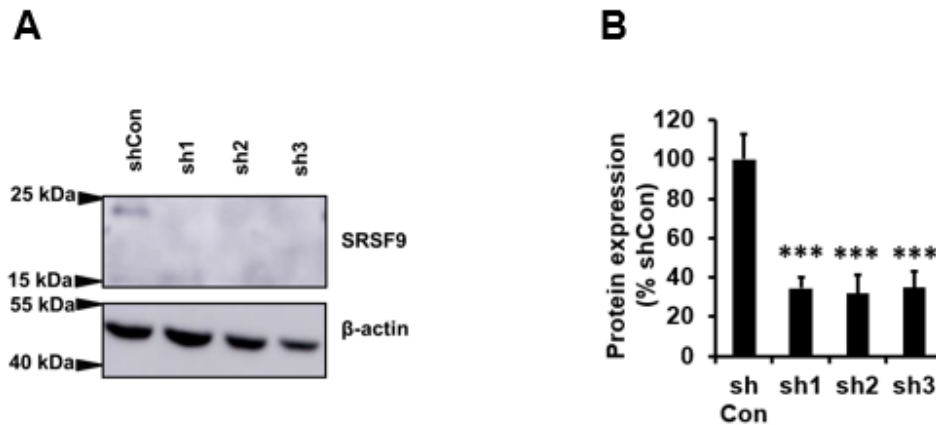

**Figure S1. Silencing of SRSF9.** (A) Western blot showing the silencing of SRSF9 protein in LL29 cells by a lentiviral shRNA (MOI 100 for 24 hrs) for SRSF9 (sh1, sh2 and sh3). shCon: vector control. (B) Quantitative analysis of the silencing efficiency of the SRSF9 shRNA at the protein level. The results were normalized to  $\beta$ -actin and expressed as %shCon. Values represent means  $\pm$  SE.  $n=3$  independent experiments. \*\*\* $P<0.001$  vs shCon. One-way ANOVA and Tukey's multiple comparison.

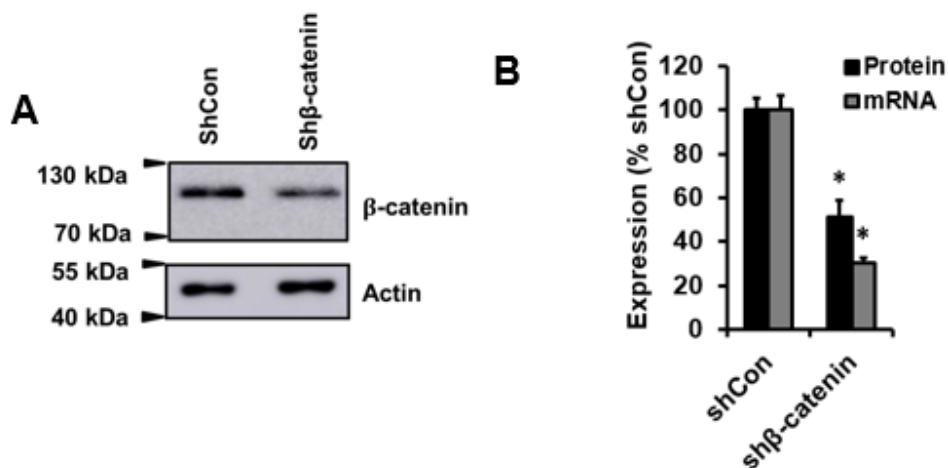

**Figure S2. Silencing of  $\beta$ -catenin.** (A) Western blot showing adenoviral shRNA-mediated silencing (MOI 100 for 24 hrs) of  $\beta$ -catenin protein levels in LL29 cells. shCon: shRNA control. (B) Quantitative analysis of  $\beta$ -catenin mRNA and protein levels after adenoviral shRNA-mediated silencing in LL29 cells. The results were normalized to  $\beta$ -actin and expressed as %shCon. Values represent means  $\pm$  SE.  $n=3$  independent experiments. \* $P < 0.05$ , vs shCon.. Student's *t*-test.

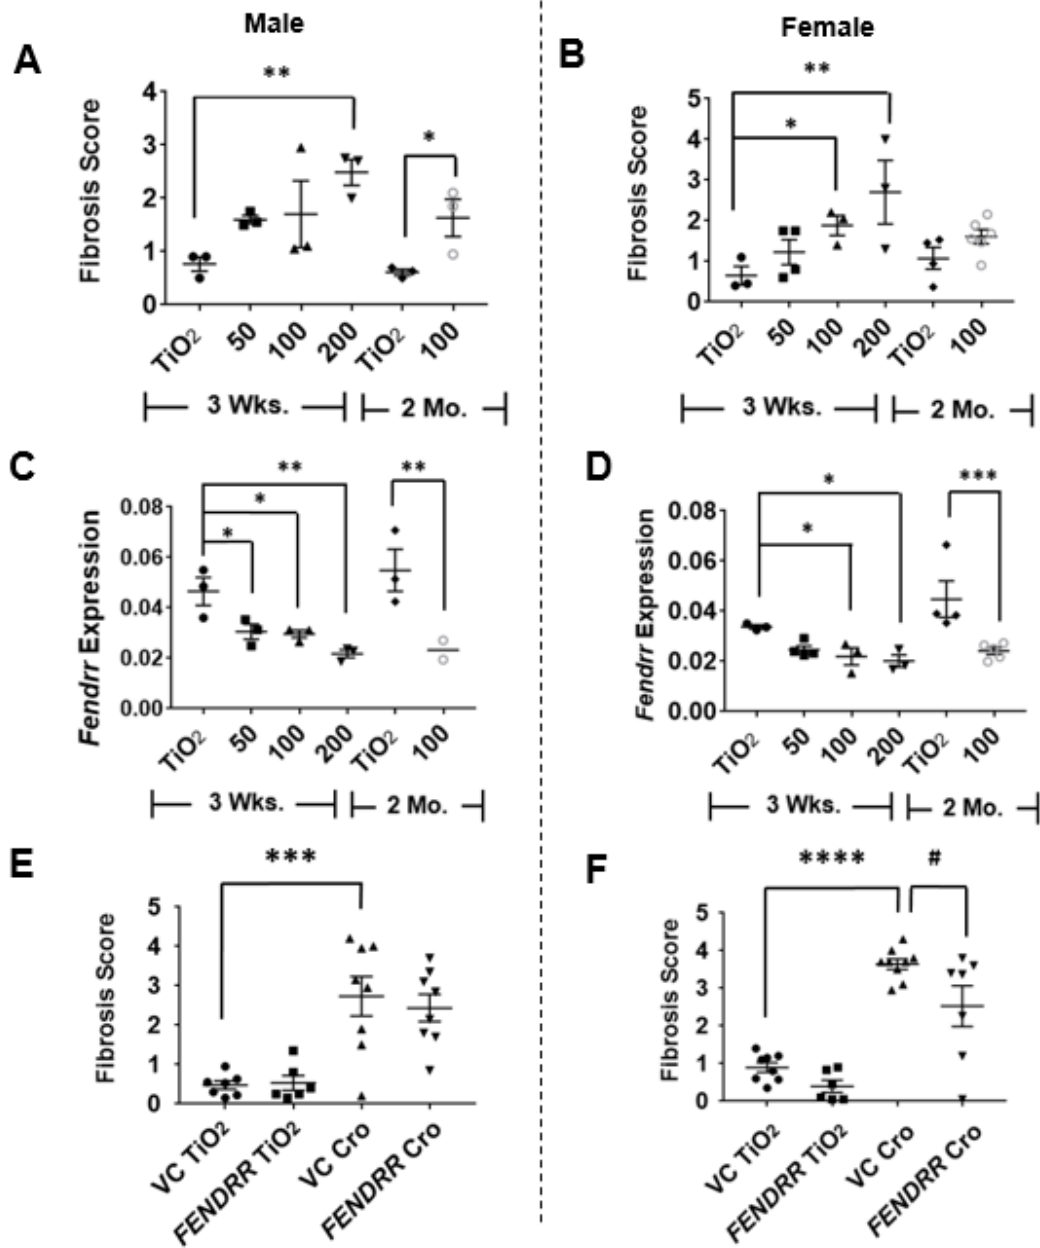

**Figure S3.** *FENDRR* reduced asbestos-induced lung fibrosis. Fibrosis scores and *Fendrr* expression of (A, C) male and (B, D) female mice exposed to different doses of crocidolite (Cro,  $\mu\text{g}$  per mouse) or control (TiO<sub>2</sub>, 100  $\mu\text{g}$  per mouse) for 3 weeks (wks) or 2 months (Mo). Fibrosis score of (E) male and (F) female mice treated with *FENDRR*, or virus control (VC) and crocidolite or TiO<sub>2</sub>. Each symbol represent one animal. \* $P < 0.05$ , \*\* $P < 0.01$ , \*\*\* $P < 0.001$ , \*\*\*\* $P < 0.0001$ . # $P < 0.05$  and # $P < 0.01$ . One-way ANOVA and Fisher's LSD test was performed for multiple comparison for A-D and One-way ANOVA and Bonferroni's multiple comparison was performed for E and F.

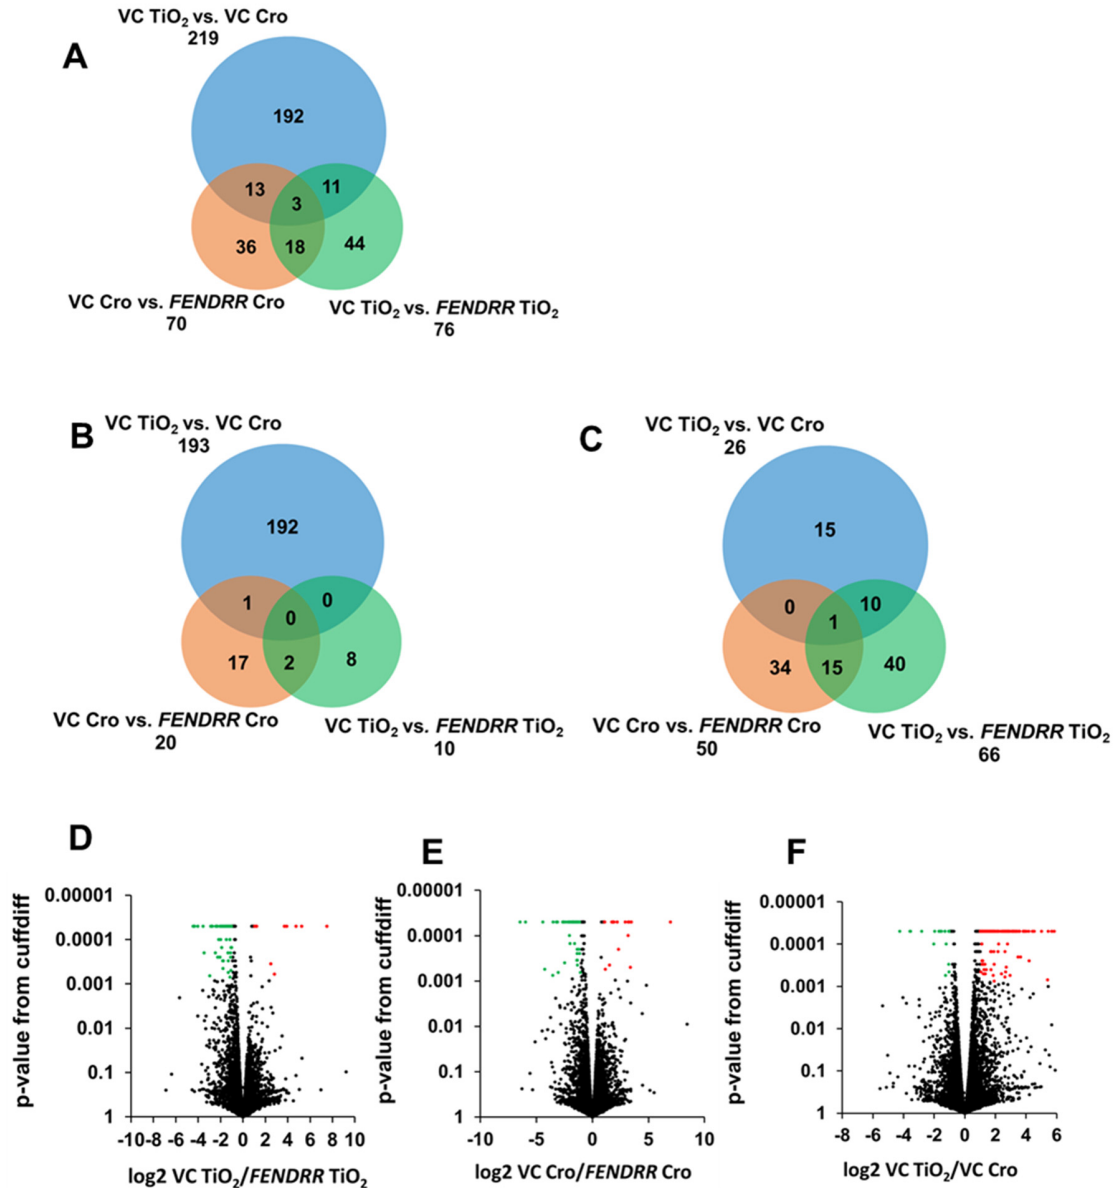

**Figure S4.** Differentially expressed genes in the lung tissues of crocidolite- and *FENDRR*-treated mice. Venn diagrams showing (A) total changed, (B) up-regulated, (C) down-regulated genes among different groups (FDR < 0.05 and fold change ≥ 2). The number of changed genes between two comparison groups is shown under treatment groups. The number in each cycle represents the number of changed genes between two comparison groups and the numbers in overlapping cycles represent the numbers of common changed genes among the comparison groups. (D-F) Volcano plots showing the distribution of differentially expressed genes between VC-TiO<sub>2</sub> and *FENDRR*-TiO<sub>2</sub>, VC-Cro and *FENDRR*-Cro, and VC-TiO<sub>2</sub> and VC-Cro. Red dots indicate significantly up-regulated transcripts and green dots indicate significantly down-regulated transcripts (FDR < 0.05 and fold change ≥ 2). Black dots indicate unchanged (fold change below 2) and non-significant transcripts (FDR ≥ 0.05).

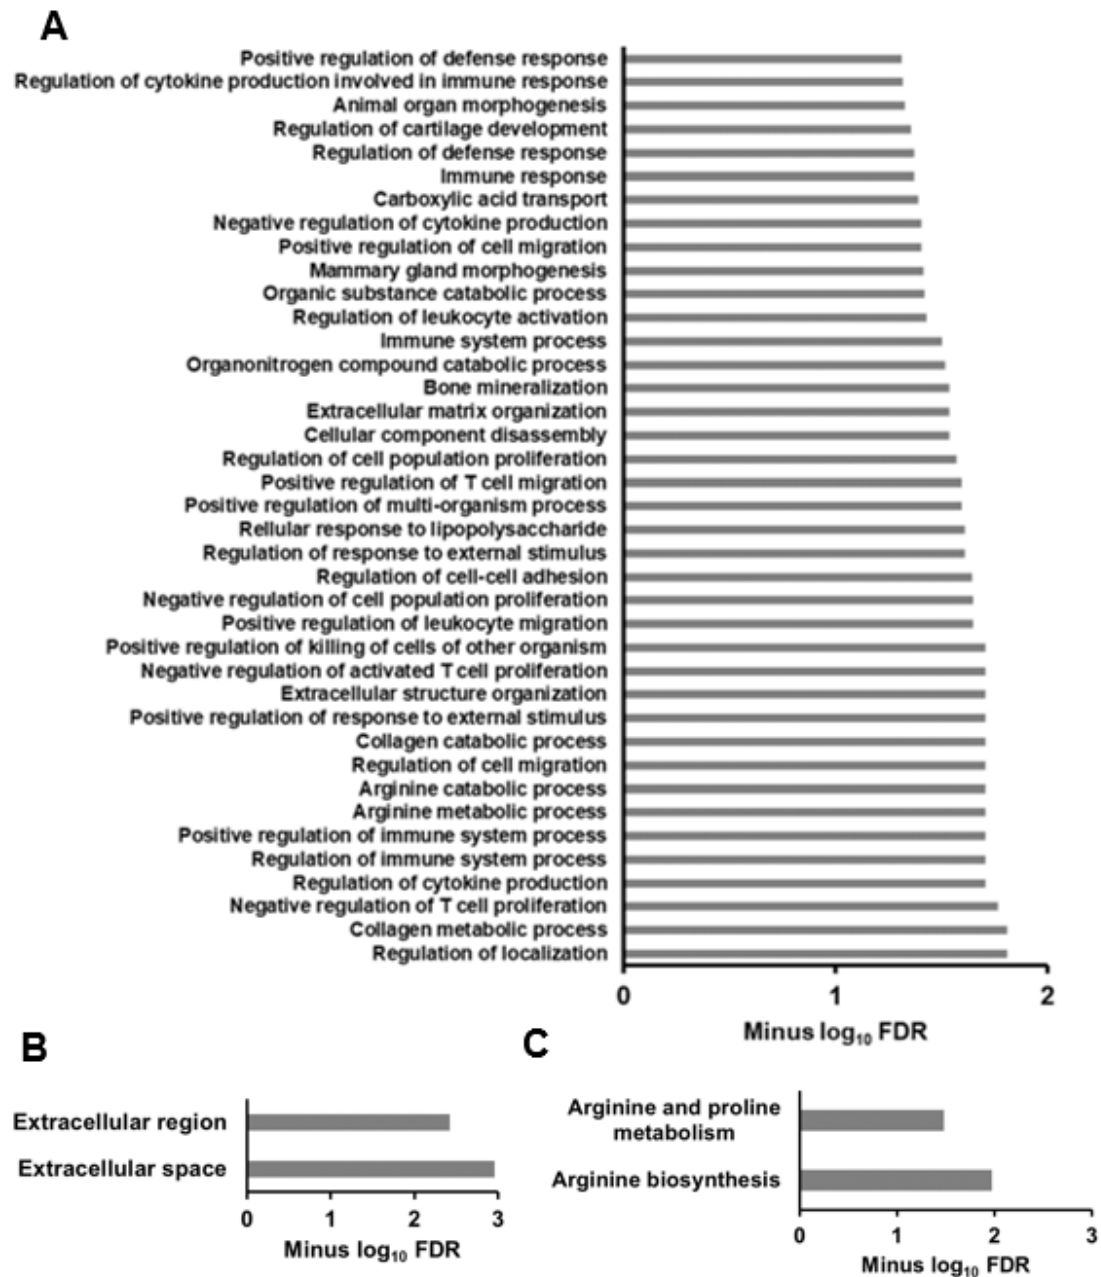

**Figure S5.** Functional annotation of crocidolite-up-regulated and *FENDRR*-down-regulated genes. (A) Biological processes. (B) Cellular components. (C) KEGG analysis. FDR were represented as minus  $\log_{10}$  FDR.

**Table S1.** Crocidolite up-regulated and *FENDRR* down-regulated genes.

| Gene Abbreviation | Gene Name | FPKM                |        |         |
|-------------------|-----------|---------------------|--------|---------|
|                   |           | VC-TiO <sub>2</sub> | VC-Cro | FENDRR- |

|                                           |                                                                                                   |       |       | Cro   |
|-------------------------------------------|---------------------------------------------------------------------------------------------------|-------|-------|-------|
| <i>Phf3</i>                               | PHD Finger Protein 3                                                                              | 21.2  | 44    | 20    |
| <i>Tmem26</i>                             | Transmembrane Protein 26                                                                          | 0.3   | 1.9   | 0.8   |
| <i>Arg1</i>                               | Arginase 1                                                                                        | 2.3   | 118.5 | 62.2  |
| <i>Gas2l3</i>                             | Growth Arrest Specific 2 Like 3                                                                   | 0.6   | 3.5   | 0.8   |
| <i>Nos2</i>                               | Nitric Oxide Synthase 2                                                                           | 1.9   | 4.5   | 2.4   |
| <i>Serpina3g</i>                          | Serpin Family A Member 3                                                                          | 30.9  | 64.6  | 37    |
| <i>Slc26a4</i>                            | Solute Carrier Family 26 Member 4                                                                 | 5.9   | 89.5  | 54    |
| <i>Scin</i>                               | Scinderin                                                                                         | 0.5   | 5.5   | 3.1   |
| <i>Wnt5a</i>                              | Wnt Family Member 5A                                                                              | 3.7   | 8.2   | 3.6   |
| <i>RP23-378M19.1*</i>                     | N/A                                                                                               | 0     | 1.6   | 0     |
| <i>Tbccd1</i>                             | TBCC Domain Containing 1                                                                          | 6.1   | 16.1  | 6.5   |
| <i>Pla2g7</i>                             | Phospholipase A2 Group VII                                                                        | 8.8   | 30    | 17.8  |
| <i>H2-M2</i>                              | Histocompatibility 2, M region locus 2                                                            | 4.7   | 28.3  | 16.5  |
| <i>Pdcd1lg2</i>                           | Programmed Cell Death 1 Ligand 2                                                                  | 0.8   | 5.3   | 2.5   |
| <i>RP23-401J24.3*,<br/>RP23-401J24.4*</i> | N/A                                                                                               | 1.4   | 16.4  | 1.9   |
| <i>Ctss</i>                               | Cathepsin S                                                                                       | 410.9 | 945.9 | 557.2 |
| <i>Chil4</i>                              | Chitinase-like protein 4                                                                          | 0.3   | 346.7 | 189.2 |
| <i>RP23-360J20.1*</i>                     | N/A                                                                                               | 0.8   | 8.2   | 1.5   |
| <i>Slc15a4</i>                            | Solute Carrier Family 15 Member 4                                                                 | 28.9  | 87.4  | 14.6  |
| <i>Gpnmb</i>                              | Glycoprotein Nmb                                                                                  | 15.3  | 116.8 | 76    |
| <i>Igkv5-43</i>                           | Immunoglobulin kappa chain variable 5-43                                                          | 38.8  | 108   | 17.4  |
| <i>Slc5a11</i>                            | Solute Carrier Family 5 Member 11                                                                 | 0.1   | 7.6   | 0.09  |
| <i>Mmp13</i>                              | Matrix Metalloproteinase 13                                                                       | 0.8   | 7.8   | 4.1   |
| <i>Smarca4</i>                            | SWI/SNF Related, Matrix Associated, Actin Dependent Regulator Of Chromatin, Subfamily A, Member 4 | 21.6  | 55.6  | 21    |
| <i>Cd99l2</i>                             | CD99 Molecule Like 2                                                                              | 18.6  | 49.5  | 15.8  |

\* Gene name is not available (N/A)

Table S2: Biological processes of crocidolite up-regulated and FENDRR down-regulated genes

| Term ID    | Term description                                          | Observed gene | Background gene | FDR    | Matching genes in network                                                              |
|------------|-----------------------------------------------------------|---------------|-----------------|--------|----------------------------------------------------------------------------------------|
| GO:0032879 | Regulation of localization                                | 11            | 2579            | 0.0156 | <i>Arg1, Cd99l2, Ctss, Gpnmb, Mmp13, Nos2, Pla2g7, Slc26a4, Smarca4, Tbccd1, Wnt5a</i> |
| GO:0032963 | Collagen metabolic process                                | 3             | 40              | 0.0156 | <i>Arg1, Ctss, Mmp13</i>                                                               |
| GO:0042130 | Negative regulation of T cell proliferation               | 3             | 61              | 0.0173 | <i>Arg1, Gpnmb, Pdc1lg2</i>                                                            |
| GO:0001817 | Regulation of cytokine production                         | 5             | 592             | 0.0196 | <i>Arg1, Gpnmb, Nos2, Pdc1lg2, Wnt5a</i>                                               |
| GO:0002682 | Regulation of immune system process                       | 7             | 1165            | 0.0196 | <i>Arg1, Cd99l2, Gpnmb, Pdc1lg2, Pla2g7, Scin, Wnt5a</i>                               |
| GO:0002684 | Positive regulation of immune system process              | 6             | 771             | 0.0196 | <i>Arg1, Cd99l2, Pdc1lg2, Pla2g7, Scin, Wnt5a</i>                                      |
| GO:0006525 | Arginine metabolic process                                | 2             | 16              | 0.0196 | <i>Arg1, Nos2</i>                                                                      |
| GO:0006527 | Arginine catabolic process                                | 2             | 9               | 0.0196 | <i>Arg1, Nos2</i>                                                                      |
| GO:0030334 | Regulation of cell migration                              | 6             | 805             | 0.0196 | <i>Cd99l2, Gpnmb, Pla2g7, Smarca4, Tbccd1, Wnt5a</i>                                   |
| GO:0030574 | Collagen catabolic process                                | 2             | 22              | 0.0196 | <i>Ctss, Mmp13</i>                                                                     |
| GO:0032103 | Positive regulation of response to external stimulus      | 4             | 285             | 0.0196 | <i>Arg1, Ctss, Pla2g7, Wnt5a</i>                                                       |
| GO:0043062 | Extracellular structure organization                      | 4             | 214             | 0.0196 | <i>Ctss, Mmp13, Pla2g7, Smarca4</i>                                                    |
| GO:0046007 | Negative regulation of activated T cell proliferation     | 2             | 9               | 0.0196 | <i>Arg1, Pdc1lg2</i>                                                                   |
| GO:0051712 | Positive regulation of killing of cells of other organism | 2             | 14              | 0.0196 | <i>Arg1, Nos2</i>                                                                      |
| GO:0002687 | Positive regulation of leukocyte migration                | 3             | 143             | 0.0225 | <i>Cd99l2, Pla2g7, Wnt5a</i>                                                           |
| GO:0008285 | Negative regulation of cell population proliferation      | 5             | 648             | 0.0225 | <i>Arg1, Gpnmb, Pdc1lg2, Scin, Wnt5a</i>                                               |
| GO:0022407 | Regulation of cell-cell adhesion                          | 4             | 360             | 0.0227 | <i>Arg1, Gpnmb, Pdc1lg2, Wnt5a</i>                                                     |
| GO:0032101 | Regulation of response to external stimulus               | 5             | 681             | 0.0247 | <i>Arg1, Ctss, Nos2, Pla2g7, Wnt5a</i>                                                 |
| GO:0071222 | Cellular response to lipopolysaccharide                   | 3             | 152             | 0.0247 | <i>Arg1, Nos2, Wnt5a</i>                                                               |

|            |                                                               |   |      |        |                                                      |
|------------|---------------------------------------------------------------|---|------|--------|------------------------------------------------------|
| GO:0043902 | Positive regulation of multi-organism process                 | 3 | 158  | 0.0254 | <i>Arg1,Nos2,Smarca4</i>                             |
| GO:2000406 | Positive regulation of T cell migration                       | 2 | 32   | 0.0254 | <i>Cd99l2,Wnt5a</i>                                  |
| GO:0042127 | Regulation of cell population proliferation                   | 7 | 1594 | 0.0268 | <i>Arg1,Gpnmb,Nos2,Pdcd1lg2,Scin,Smarca4,Wnt5a</i>   |
| GO:0022411 | Cellular component disassembly                                | 3 | 185  | 0.029  | <i>Ctss,Mmp13,Smarca4</i>                            |
| GO:0030198 | Extracellular matrix organization                             | 3 | 180  | 0.029  | <i>Ctss,Mmp13,Smarca4</i>                            |
| GO:0030282 | Bone mineralization                                           | 2 | 40   | 0.029  | <i>Gpnmb,Mmp13</i>                                   |
| GO:1901565 | Organo-nitrogen compound catabolic process                    | 5 | 790  | 0.0304 | <i>Arg1,Chil4,Ctss,Mmp13,Nos2</i>                    |
| GO:0002376 | Immune system process                                         | 7 | 1703 | 0.0314 | <i>Arg1,Cd99l2,Ctss,Nos2,Serpina3g,Smarca4,Wnt5a</i> |
| GO:0002694 | Regulation of leukocyte activation                            | 4 | 479  | 0.0373 | <i>Arg1,Gpnmb,Pdcd1lg2,Wnt5a</i>                     |
| GO:1901575 | Organic substance catabolic process                           | 6 | 1276 | 0.0382 | <i>Arg1,Chil4,Ctss,Mmp13,Nos2,Pla2g7</i>             |
| GO:0060443 | Mammary gland morphogenesis                                   | 2 | 53   | 0.0388 | <i>Arg1,Wnt5a</i>                                    |
| GO:0030335 | Positive regulation of cell migration                         | 4 | 500  | 0.0395 | <i>Cd99l2,Gpnmb,Pla2g7,Wnt5a</i>                     |
| GO:0001818 | Negative regulation of cytokine production                    | 3 | 229  | 0.0396 | <i>Arg1,Gpnmb,Pdcd1lg2</i>                           |
| GO:0046942 | Carboxylic acid transport                                     | 3 | 233  | 0.0409 | <i>Nos2,Slc15a4,Slc26a4</i>                          |
| GO:0006955 | Immune response                                               | 5 | 914  | 0.0429 | <i>Arg1,Ctss,Nos2,Serpina3g,Wnt5a</i>                |
| GO:0031347 | Regulation of defense response                                | 4 | 538  | 0.0429 | <i>Arg1,Ctss,Nos2,Wnt5a</i>                          |
| GO:0061035 | Regulation of cartilage development                           | 2 | 64   | 0.0441 | <i>Scin,Wnt5a</i>                                    |
| GO:0009887 | Animal organ morphogenesis                                    | 5 | 956  | 0.0473 | <i>Arg1,Mmp13,Slc26a4,Smarca4,Wnt5a</i>              |
| GO:0002718 | Regulation of cytokine production involved in immune response | 2 | 69   | 0.0481 | <i>Arg1,Wnt5a</i>                                    |
| GO:0031349 | Positive regulation of defense response                       | 3 | 268  | 0.049  | <i>Arg1,Ctss,Wnt5a</i>                               |

\*Number of significantly changed genes in the input which are involved in a GO term. # Total number of genes annotated to a GO term

Table S3: Cellular components of crocidolite up-regulated and FENDRR down-regulated genes



| Term ID    | Term description     | Observed gene count* | Background gene count# | FDR    | Matching genes in network                                                |
|------------|----------------------|----------------------|------------------------|--------|--------------------------------------------------------------------------|
| GO:0005615 | Extracellular space  | 8                    | 1131                   | 0.0011 | <i>Arg1, Ctss, Mmp13, Nos2, Pla2g7, Serpina3g, Slc26a4, Wnt5a</i>        |
| GO:0005576 | Extracellular region | 9                    | 2044                   | 0.0038 | <i>Arg1, Chil4, Ctss, Mmp13, Nos2, Pla2g7, Serpina3g, Slc26a4, Wnt5a</i> |

\*Number of significantly changed genes in the input which are involved in a GO term

# Total number of genes annotated to a GO term

**Table S4: KEGG analysis of crocidolite up-regulated and FENDRR down-regulated genes**

| Term ID  | Term description                | Observed gene count* | Background gene count# | FDR    | Matching genes in network |
|----------|---------------------------------|----------------------|------------------------|--------|---------------------------|
| mmu00220 | Arginine biosynthesis           | 2                    | 19                     | 0.0106 | <i>Arg1, Nos2</i>         |
| mmu00330 | Arginine and proline metabolism | 2                    | 50                     | 0.0329 | <i>Arg1, Nos2</i>         |

\*Number of significantly changed genes in the input which are involved in a GO term

# Total number of genes annotated to a GO term

**Table S5: Primers for the construction of plasmids**

|                         |                                                                     |
|-------------------------|---------------------------------------------------------------------|
| <i>FENDRR</i> -FW       | TTTCTCGAGCAGACAGCGCGGGCTGGGAG                                       |
| <i>FENDRR</i> -RE       | TTTGGTCTCGAATTGTCCATCGAGTTGTCATGCTT                                 |
| <i>FENDRR</i> -shRNA-FW | GATCCGATTTGCCAGCAACTGCATCATTCAAGAGATGATGCA<br>GTTGCTGGCAAATCCTTTTTG |
| <i>FENDRR</i> -shRNA-RE | AATTCAAAAAGATTTGCCAGCAACTGCATCATCTCTTGAATG<br>ATGCAGTTGCTGGCAAATCG  |
| <i>SRSF9</i> -shRNA-FW1 | GATCCGGAATATGCCCTGCGTAAACTTTCAAGAGAAGTTTAC<br>GCAGGGCATATTCCTTTTTG  |
| <i>SRSF9</i> -shRNA-RE1 | AATTCAAAAAGGAATATGCCCTGCGTAAACTTCTCTTGAAAG<br>TTTACGCAGGGCATATTCCG  |
| <i>SRSF9</i> -shRNA-FW2 | GATCCGCAGAGGATGCTATTTATGGATTCAAGAGATCCATAA<br>ATAGCATCCTCTGCTTTTTG  |
| <i>SRSF9</i> -shRNA-RE2 | AATTCAAAAAGCAGAGGATGCTATTTATGGATCTCTTGAATC<br>CATAAATAGCATCCTCTGCG  |
| <i>SRSF9</i> -shRNA-FW3 | GATCCGGAGGACCTGTTCTACAAGTATTCAAGAGATACTTGT<br>AGAACAGGTCCTCCTTTTTG  |
| <i>SRSF9</i> -shRNA-RE3 | AATTCAAAAAGGAGGACCTGTTCTACAAGTATCTCTTGAATA<br>CTTGTAGAACAGGTCCTCCG  |

FW: Forward, RE: Reverse. Species: human

**Table S6: Primers used for real-time PCR**

|                     |                          |
|---------------------|--------------------------|
| hTCF1-FW            | AGGCCAAGAAGCCAACCATCAAGA |
| hTCF1-RE            | ACTCTGCAATGACCTTGGCTCTCA |
| hLEF1-FW            | GCTTTATCCAGGCTGGTCTGCAA  |
| hLEF1-RE            | GACCTGTACCTGATGCAGATTCCT |
| hAXIN2-FW           | ACAACAGCATTGTCTCCAAGCAGC |
| hAXIN2-RE           | GCGCCTGGTCAAACATGATGGAAT |
| hFENDRR-FW          | GCGCACAGACCCAGGATTT      |
| hFENDRR-RE          | CACGGGCAGAGCTGGTTT       |
| h $\beta$ -actin-FW | GCCGGGACCTGACTGACTAC     |
| h $\beta$ -actin-RE | TTCTCCTTAATGTCACGCACGAT  |
| mFendrr-FW          | CACGATCCCAGGTGGACTTG     |
| mFendrr-RE          | TGCAGGAGTGAAGGGTGTCTCT   |
| mGapdh-FW           | CTCGTCCCGTAGACAAAATGGT   |
| mGapdh-RE           | TGATGGCAACAATCTCCACTT    |

FW: Forward, RE: reverse

"h" stands for human and "m" stands for mouse
